# Supplementary material for: Zika RNA and Flavivirus-Like Antigens in the Sperm Cells of Symptomatic and Asymptomatic Subjects
Source: MDPI journal article supplement (doi:10.3390/v13020152), 2021-01-21
Supplement: s1 [file s1]

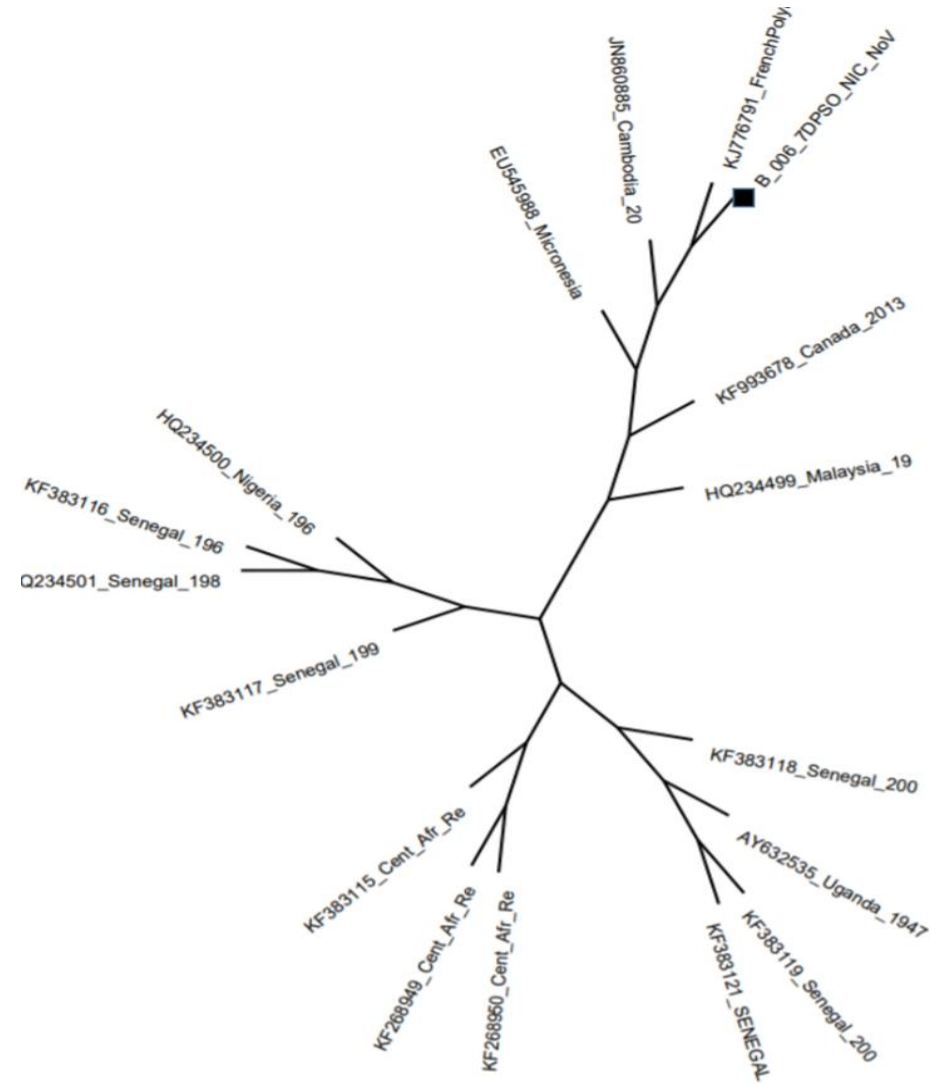

Figure S1. Phylogenetic analysis of a partial sequence from the E ZIKV gene. The consensus of the forward and reverse sequences (293 bp) segment from the E gene (nt 1595 to 1887, ref KJ776791). The phylogenetic tree was constructed based on neighbor-joining method by using the ZIKV typing tool Ref [31]. The black square represent the Nicaraguan sequence (Subject B, 7DPSO, NIC, November 2016).
